# Supplementary material
Source: HighWire-hosted journal article supplement (http://rc.rcjournal.com/highwire/filestream/12341/field_highwire_adjunct_files/3/suppl4.docx)
Supplement: suppl4.docx [file suppl4.docx]

**SUPPLEMENTAL DIGITAL CONTENT 4**

*Endotracheal tubes collected*

| Endotracheal Tube Model | Size (mm) | Control group (n) | Treatment group (n) |
| --- | --- | --- | --- |
| Mallinckrodt Hi−Lo Oral/Nasal Tracheal Tube  (Covidien, Mansfield, MA) | 6.5 | 1 | - |
| 7.0 | 4 | 7 |
| 7.5 | 12 | 7 |
| 8.0 | 4 | 2 |
| Rusch Safety Clear Plus Endotracheal Tube  (Teleflex Medical, Research Triangle Park, NC) | 7.0 | 1 | 3 |
| 7.5 | 11 | 7 |
| 8.0 | 2 | 1 |
| Sheridan/HVT Tracheal Tube  (Teleflex Medical, Research Triangle Park, NC) | 7.0 | 1 | - |
| 7.5 | - | 2 |
| 8.0 | 1 | 1 |
| Mallinckrodt TaperGuard Evac  (Covidien, Mansfield, MA) | 7.5 | - | 1 |
| 8.0 | - | 1 |
| SourceMark Standard High Volume – Low Pressure ETT (SourceMark, Brentwood, TN) | 7.5 | - | 1 |
| Vital Signs RediTube Tracheal Tube  (Vital Signs, Silver Spring, MD) | 8.0 | - | 1 |
